# Supplementary material for: FBP1 orchestrates keratinocyte proliferation/differentiation and suppresses psoriasis through metabolic control of histone acetylation
Source: PubMed Central journal article supplement (PMC11150480; doi:10.1038/s41419-024-06706-6), 2024-06-04

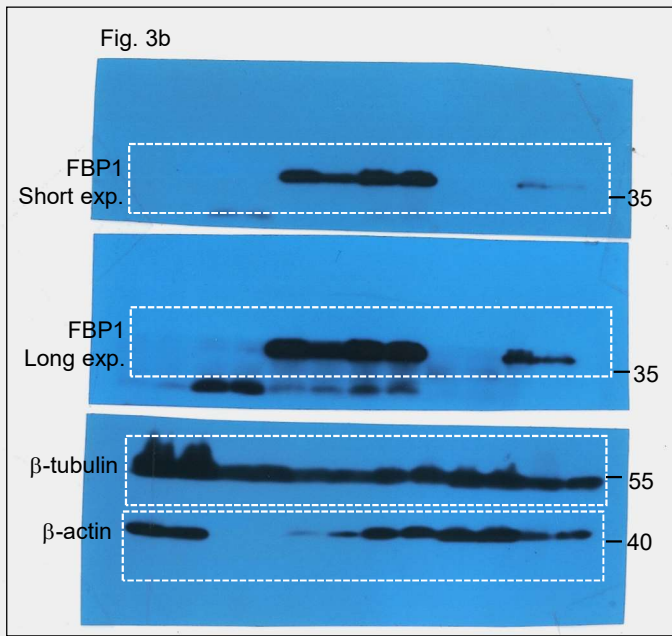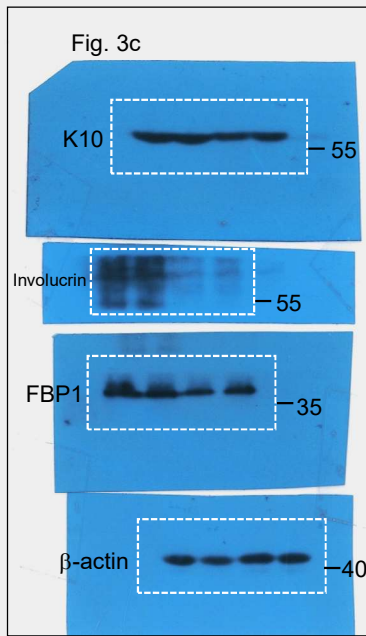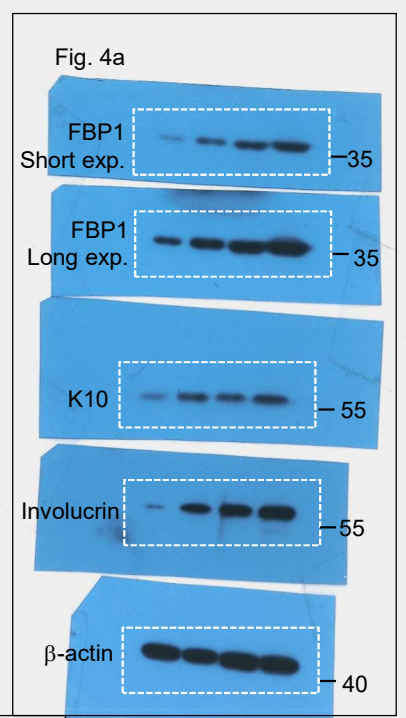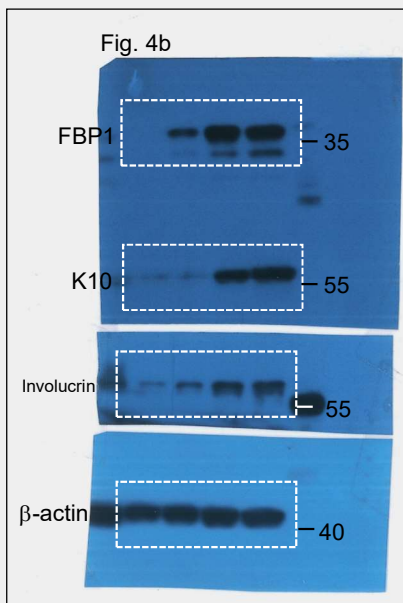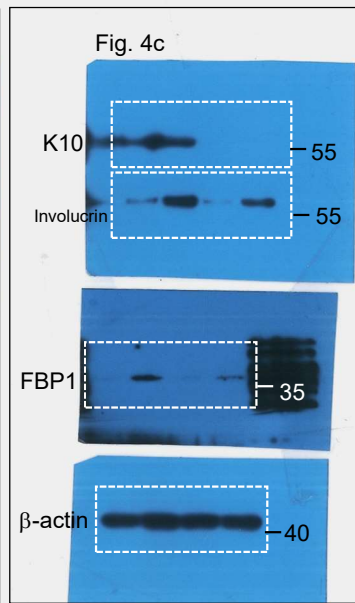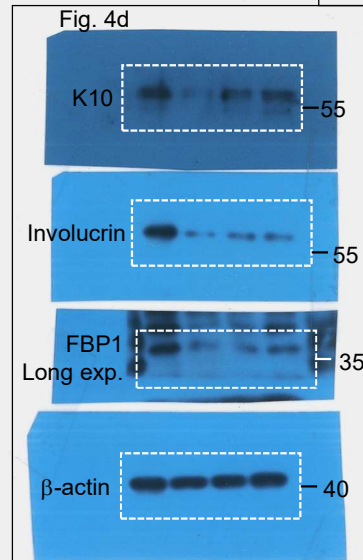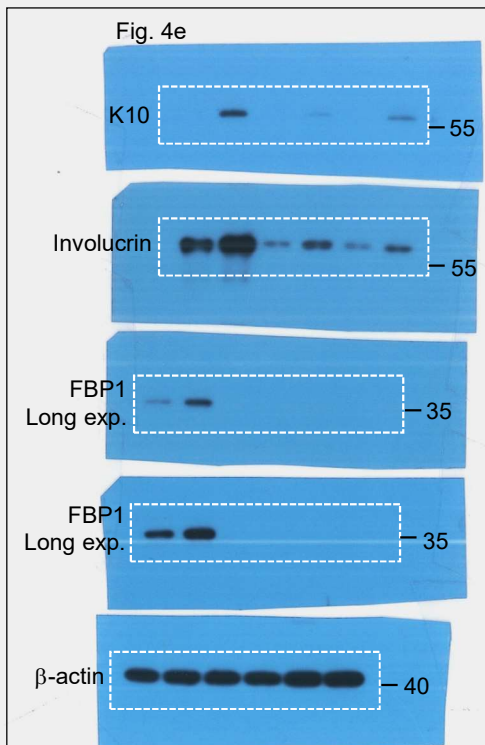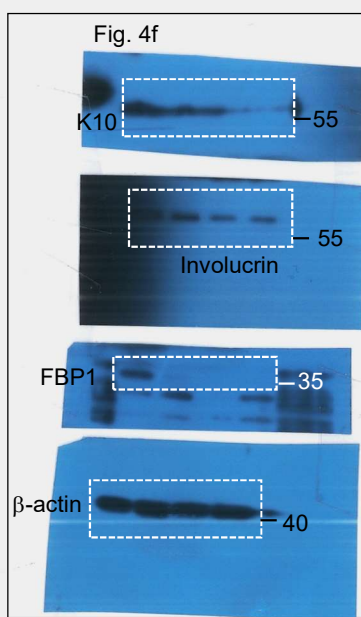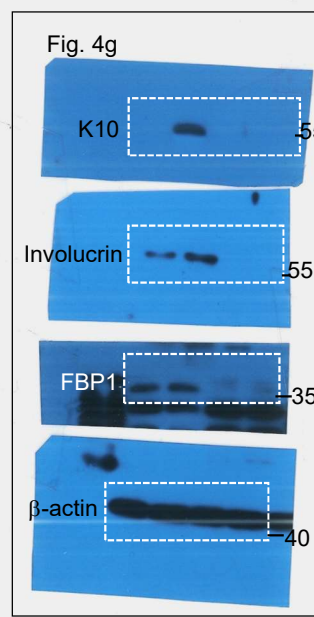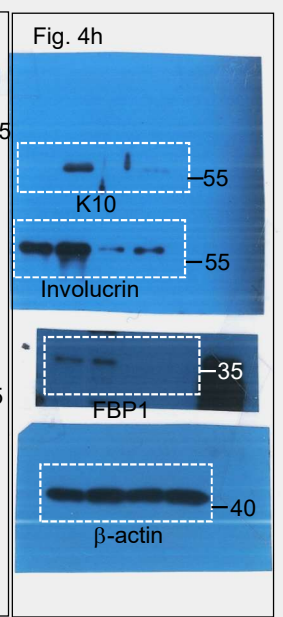

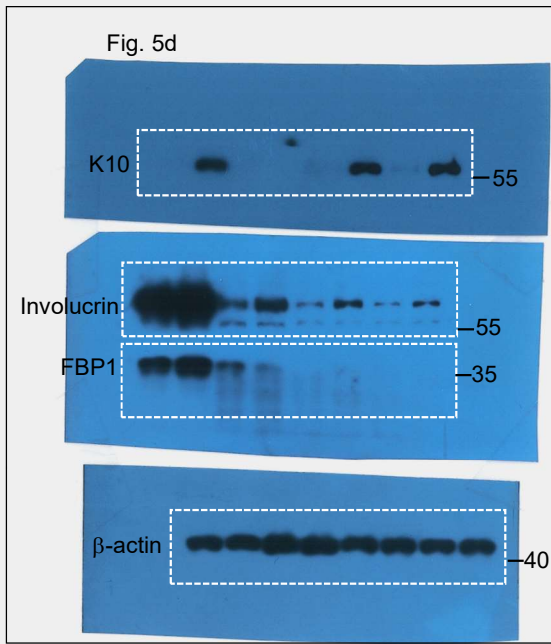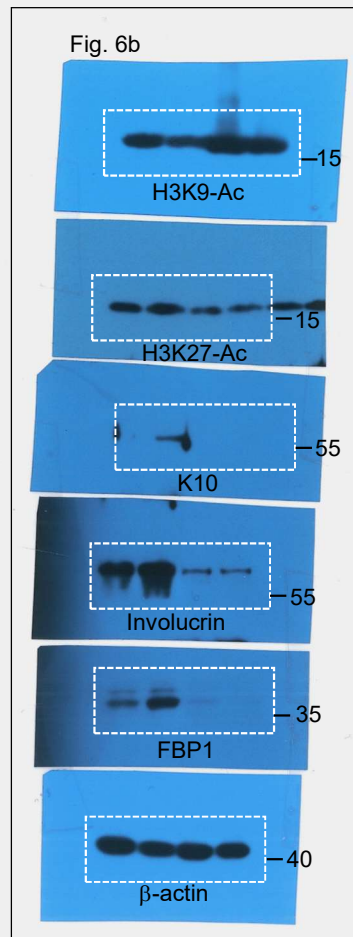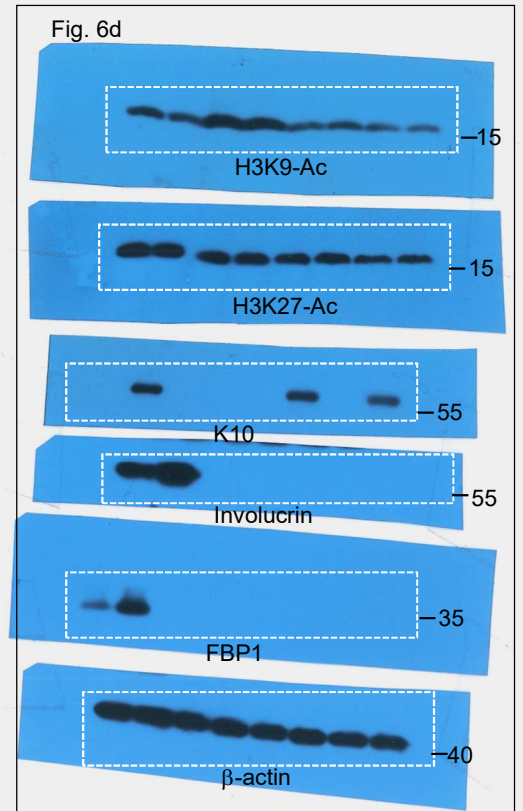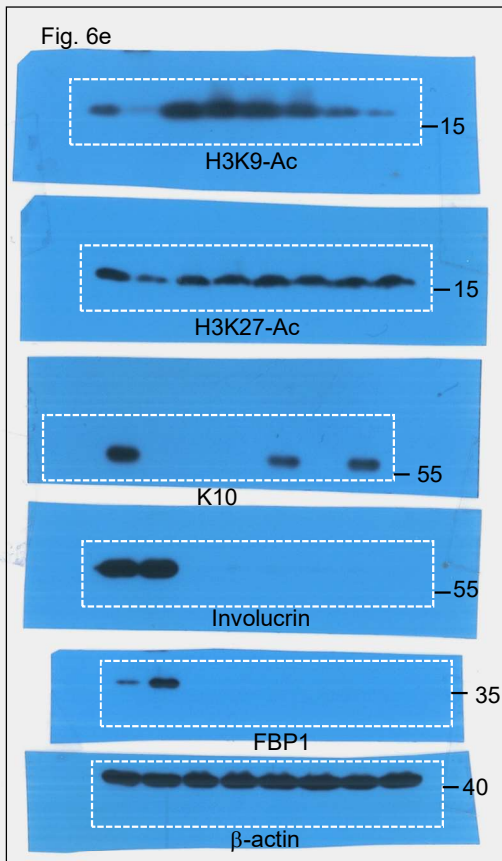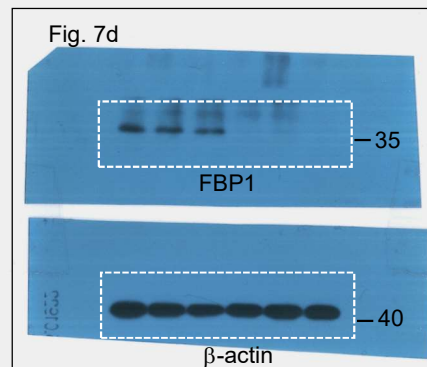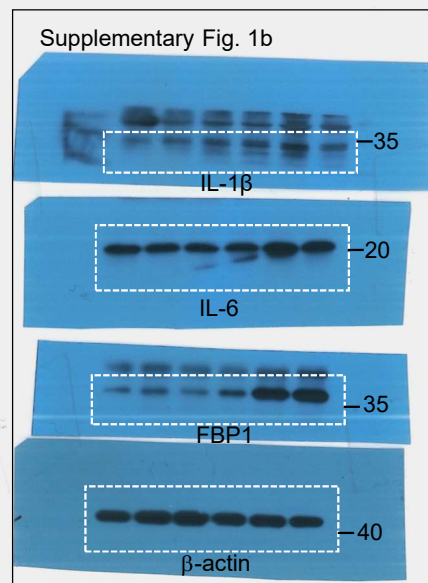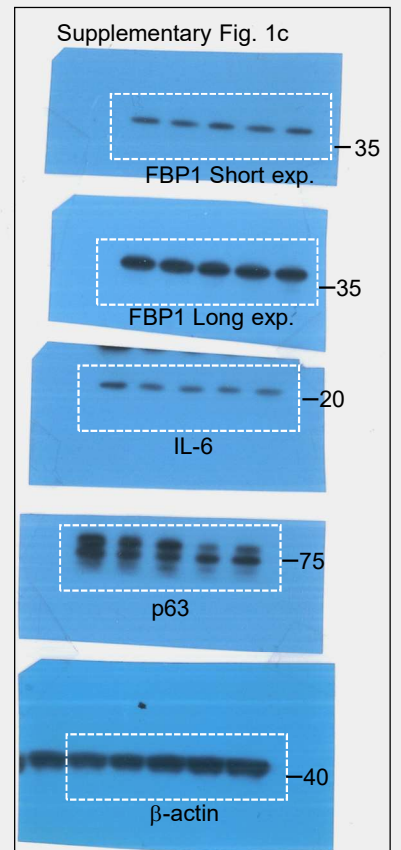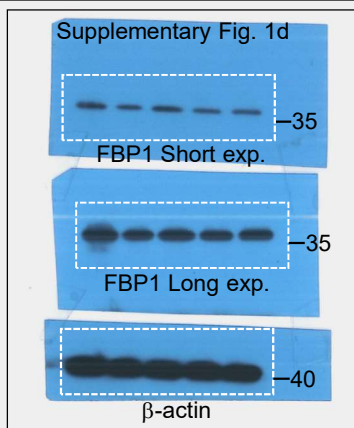

Supplementary Fig. 3a

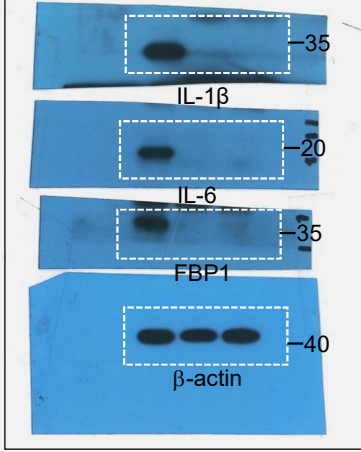

Supplementary Fig. 3c

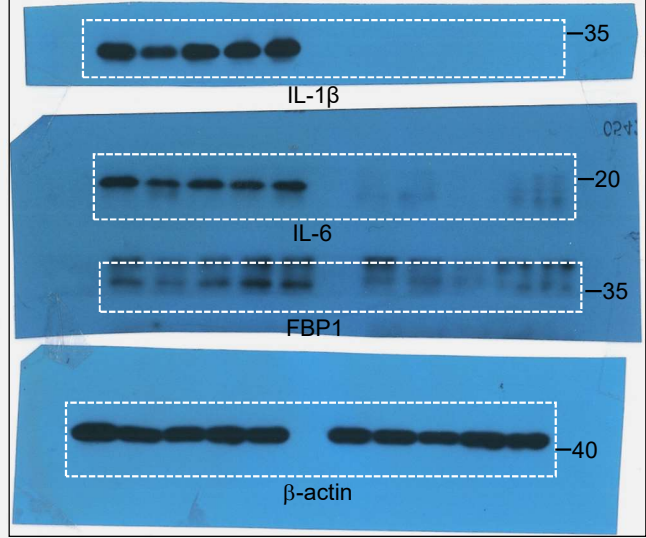

Supplement: 41419_2024_6706_MOESM2_ESM.pdf [file 41419_2024_6706_MOESM2_ESM.pdf]
