# Supplementary material for: FBP1 orchestrates keratinocyte proliferation/differentiation and suppresses psoriasis through metabolic control of histone acetylation
Source: PubMed Central journal article supplement (PMC11150480; doi:10.1038/s41419-024-06706-6), 2024-06-04
Supplement: 41419_2024_6706_MOESM1_ESM.pdf [file 41419_2024_6706_MOESM1_ESM.pdf]

## SUPPLEMENTARY INFORMATION

### FBP1 orchestrates keratinocyte proliferation/differentiation and suppresses psoriasis through metabolic control of histone acetylation

Pengfei Zhang<sup>1&</sup>, Ju Yang<sup>2&</sup>, Xiong Liu<sup>3&</sup>, Congshu Huang<sup>1</sup>, Yuandong Tao<sup>4</sup>, Pan Shen<sup>1</sup>, Zhijie Bai<sup>1</sup>, Chengrong Xiao<sup>1</sup>, Lei Zhou<sup>1</sup>, Gaofu Li<sup>1</sup>, Li Zhang<sup>3</sup>, Wei Zhou<sup>1\*</sup>, Yue Gao<sup>1\*</sup>

### SUPPLEMENTARY FIGURES

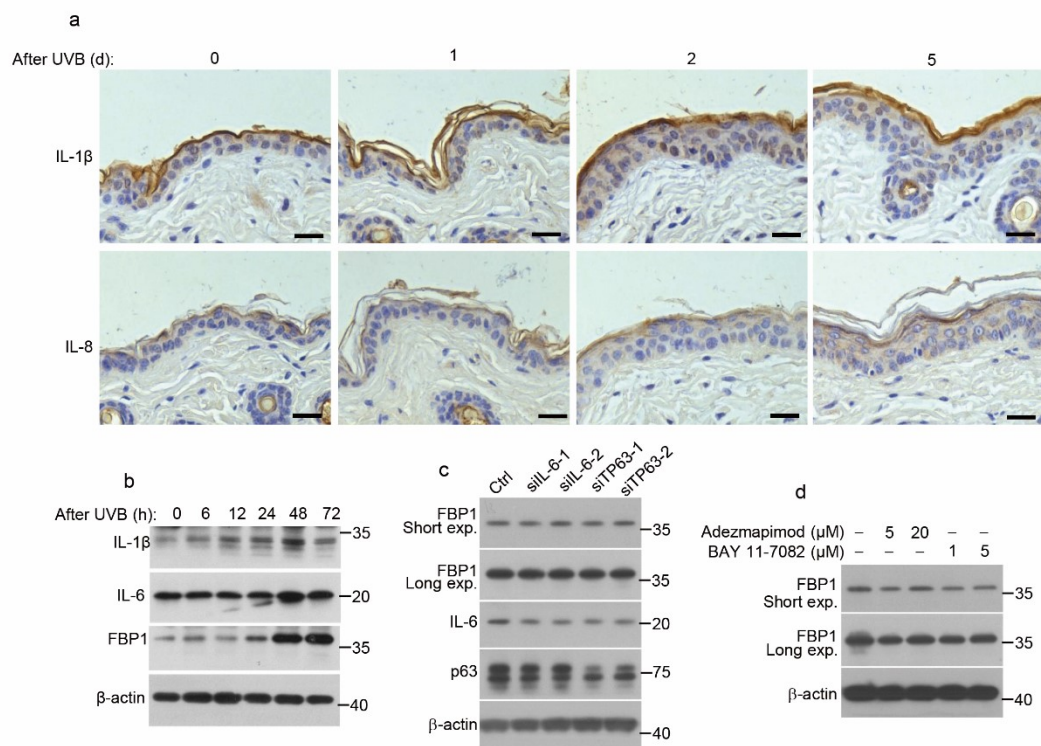

**Supplementary Fig. 1 a**, Representative immunohistochemical staining for IL-1β and IL-8 of mice skin collected at indicated days after irradiation. Scale bars: 25 μm. **b**, Western blot analysis of IL-1β, IL-6, FBP1 and β-actin in HaCaT cells at indicated time after UVB irradiation. **c**, Western blot analysis of the expression of indicated proteins in keratinocytes 72 hours after transfection of *IL-6* siRNA (siIL-6-1, siIL-6-2) or *TP63* siRNA (siTP63-1, siTP63-2). **d**, Western blot analysis of the expression of

indicated proteins in keratinocytes 48 hours after adezmapimod or BAY 11-7082 treatment.

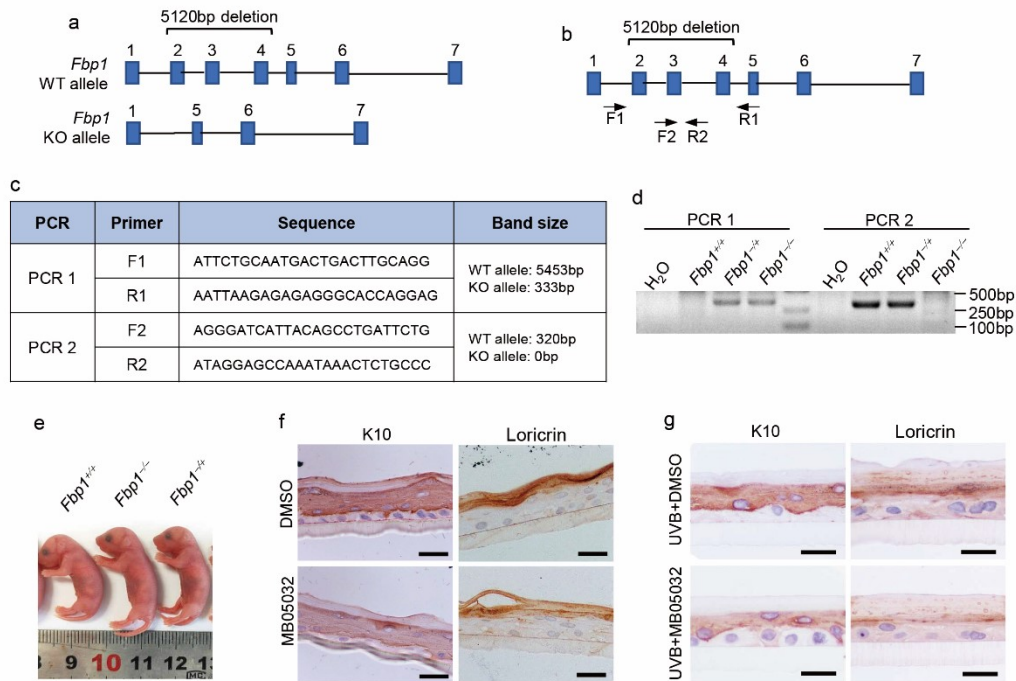

**Supplementary Fig. 2 a**, Schematic diagram for *Fbp1* deletion in mice. **b**, Schematic diagram for genotyping primers of *Fbp1*. **c**, Sequence of genotyping primers of *Fbp1*. **d**, PCR detection of a deletion in the *Fbp1* gene. Genomic DNA from *Fbp1*<sup>+/+</sup>, *Fbp1*<sup>-/+</sup> and *Fbp1*<sup>-/-</sup> mice were amplified with primers shown in c and detected by agarose gel electrophoresis. **e**, Photos of neonatal *Fbp1*<sup>+/+</sup>, *Fbp1*<sup>-/+</sup> and *Fbp1*<sup>-/-</sup> littermates. **f**, Representative immunohistochemical staining (K10, loricrin) of DMSO or MB05032 (40  $\mu$ M) treated human epidermal equivalents. Scale bars: 25  $\mu$ m. **g**, Human epidermal equivalents were exposed to 500 mJ/cm<sup>2</sup> UVB irradiation and then treated with DMSO or MB05032 (40  $\mu$ M) for 3 days and collected. Representative immunohistochemical staining for K10 and loricrin were shown. Scale bars: 25  $\mu$ m.

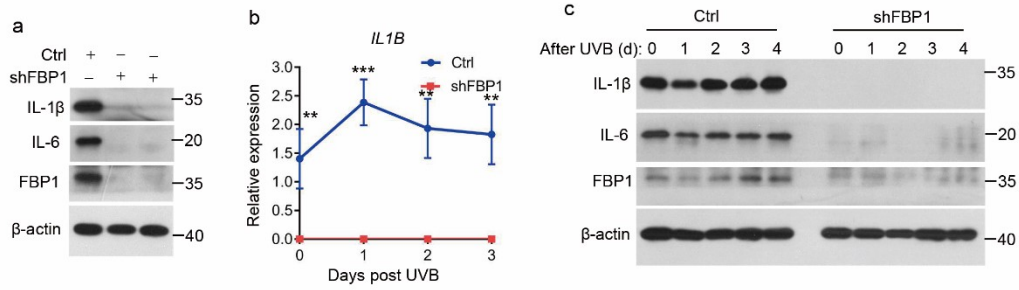

**Supplementary Fig. 3 a**, Western blot analysis of the IL-1 $\beta$ , IL-6, FBP1 and  $\beta$ -actin in Ctrl and shFBP1 HaCaT cells. **b**, Relative mRNA levels of *IL-1 $\beta$*  in Ctrl and shFBP1 HaCaT cells at indicated days after UVB irradiation (50 mJ/cm<sup>2</sup>). n = 3 independent experiments. **c**, Western blot analysis of the IL-1 $\beta$ , IL-6, FBP1 and  $\beta$ -actin in Ctrl and shFBP1 HaCaT cells at indicated days after UVB irradiation (50 mJ/cm<sup>2</sup>). Data are shown as mean  $\pm$  s.d. Statistical analyses in **(b)** were performed with Student's t-tests. \*\* p < 0.01, \*\*\* p < 0.001.

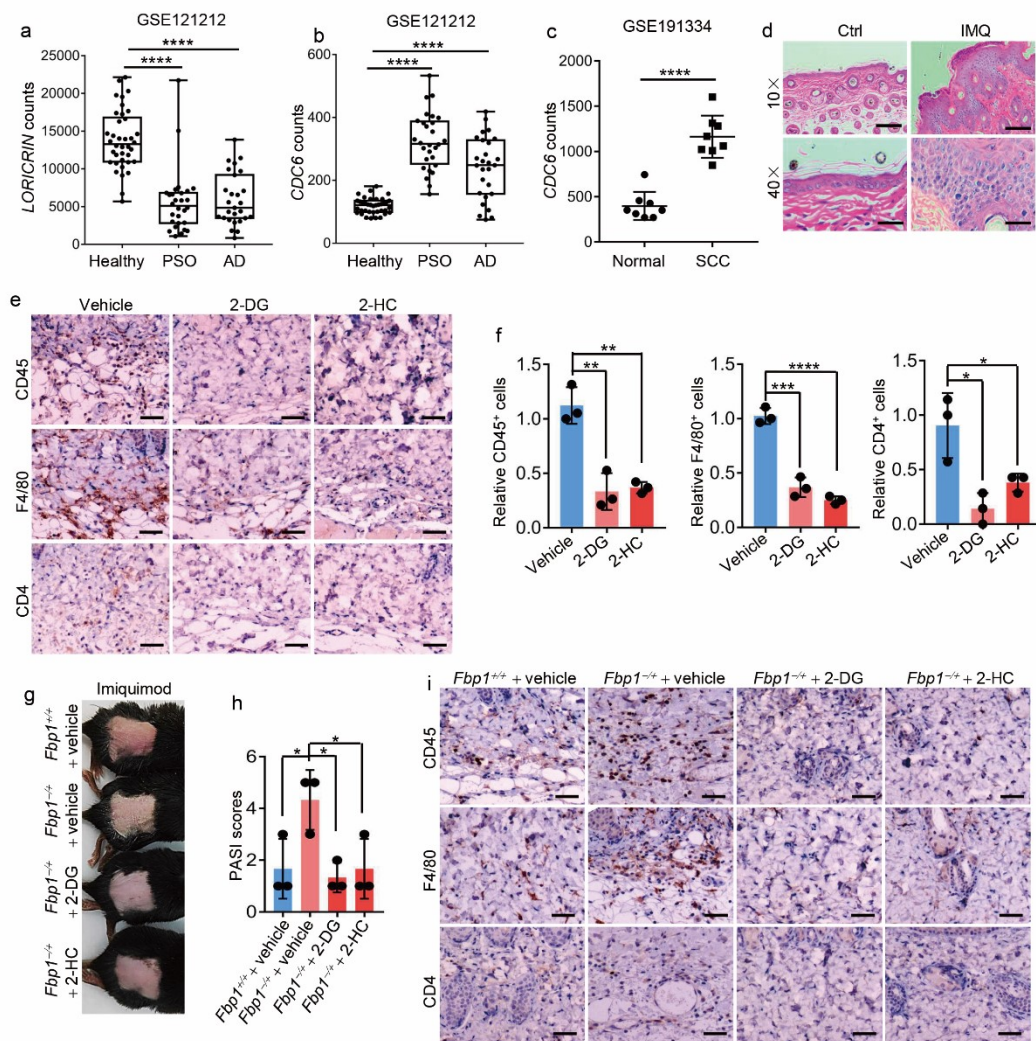

**Supplementary Fig. 4 a, b**, *LORICRIN* (a) or *CDC6* (b) levels in healthy skin, psoriatic lesions or atopic dermatitis lesions based on RNA-Seq datasets from public databases GSE121212. **c**, *CDC6* levels in normal skin or squamous cell carcinoma based on GSE191334. **d**, Representative H&E staining of skin from Ctrl or imiquimod treated mice. Scale bars in upper images: 200  $\mu\text{m}$ , scale bars in lower images: 50  $\mu\text{m}$ . **e**, Immunohistochemical staining for CD45, F4/80 or CD4 of imiquimod induced skin lesions from vehicle, 2-DG or 2-HC pretreated mice. Scale bars: 50  $\mu\text{m}$ . **f**, Relative leukocytes (CD45<sup>+</sup>), macrophages (F4/80<sup>+</sup>) or T cells (CD4<sup>+</sup>) numbers of imiquimod induced skin lesions (8 days) from vehicle, 2-DG or 2-HC pretreated mice. n = 3 mice per group. **g**, Photos of imiquimod induced skin lesions (5 days) from vehicle pretreated *Fbp1*<sup>+/+</sup> mice, vehicle, 2-DG or 2-HC pretreated

*Fbp1*<sup>-/-</sup> mice. **h**, The Psoriasis Area and Severity Index (PASI) score for imiquimod induced skin lesions (5 days) from vehicle pretreated *Fbp1*<sup>+/+</sup> mice, vehicle, 2-DG or 2-HC pretreated *Fbp1*<sup>-/-</sup> mice. n = 3 mice per group. **i**, Immunohistochemical staining for CD45, F4/80 or CD4 of imiquimod induced skin lesions (8 days) from vehicle pretreated *Fbp1*<sup>+/+</sup> mice, vehicle, 2-DG or 2-HC pretreated *Fbp1*<sup>-/-</sup> mice. Scale bars: 50 µm. Data are shown as mean ± s.d. Statistical analyses in **(a)**, **(b)**, **(c)**, **(f)** and **(h)** were performed with Student's t-tests. \* p< 0.05, \*\* p< 0.01, \*\*\* p< 0.001, \*\*\*\* p< 0.0001.

## SUPPLEMENTARY TABLES

**Supplementary table 1.** RT-qPCR primers used in this study.

| Gene             | Forward primers         | Reverse Primers         |
|------------------|-------------------------|-------------------------|
| <i>CYP24A1</i>   | GCAGCCTAGTGCAGATTT      | ATTCACCCAGAACTGTTG      |
| <i>FBP1</i>      | ACCCTGCCGTCACCTGAGTA    | GCCCCATAAGGAGCTGAAT     |
| <i>HRNR</i>      | TCGAGACCATAACAAGAAAGTGG | GTGAGTGTCATCTCTCAGCTTTG |
| <i>GAST</i>      | ATGCAGCGACTATGTGTGTATG  | GCCCCTGTACCTAAGGGTG     |
| <i>TNFRSF10C</i> | TGCACAGAGGGTGTGGATTAC   | ATTCCGGAAGGTGCCTTCTTT   |
| <i>CDC6</i>      | CCAGGCACAGGCTACAATCAG   | AACAGGTTACGGTTTGGACATT  |
| <i>TP63</i>      | GGACCAGCAGATTCAGAACGG   | AGGACACGTCGAAACTGTGC    |
| <i>MYC</i>       | GGCTCCTGGCAAAGGTCA      | CTGCGTAGTTGTGCTGATGT    |
| <i>IL1B</i>      | CTGTCCTGCGTGTTGAAAGA    | TTCTGCTTGAGAGGTGCTGA    |

**Supplementary table 2.** The target sequences of lentiviral shRNAs used in this study.

| siRNA    | Target sequence     |
|----------|---------------------|
| siIL-6-1 | GCAAAGAGGCACTGGCAGA |
| siIL-6-2 | AGACTTGCCTGGTGAAAAT |
| siTP63-1 | GGACAGCAGCATTGATCAA |
| siTP63-2 | CCACTGAACTGAAGAACT  |
